# Supplementary material
Source: publisher figshare collection journal article supplement (https://frontiersin.figshare.com/ndownloader/files/24784295)
Supplement: Supplementary file [file 24784295]

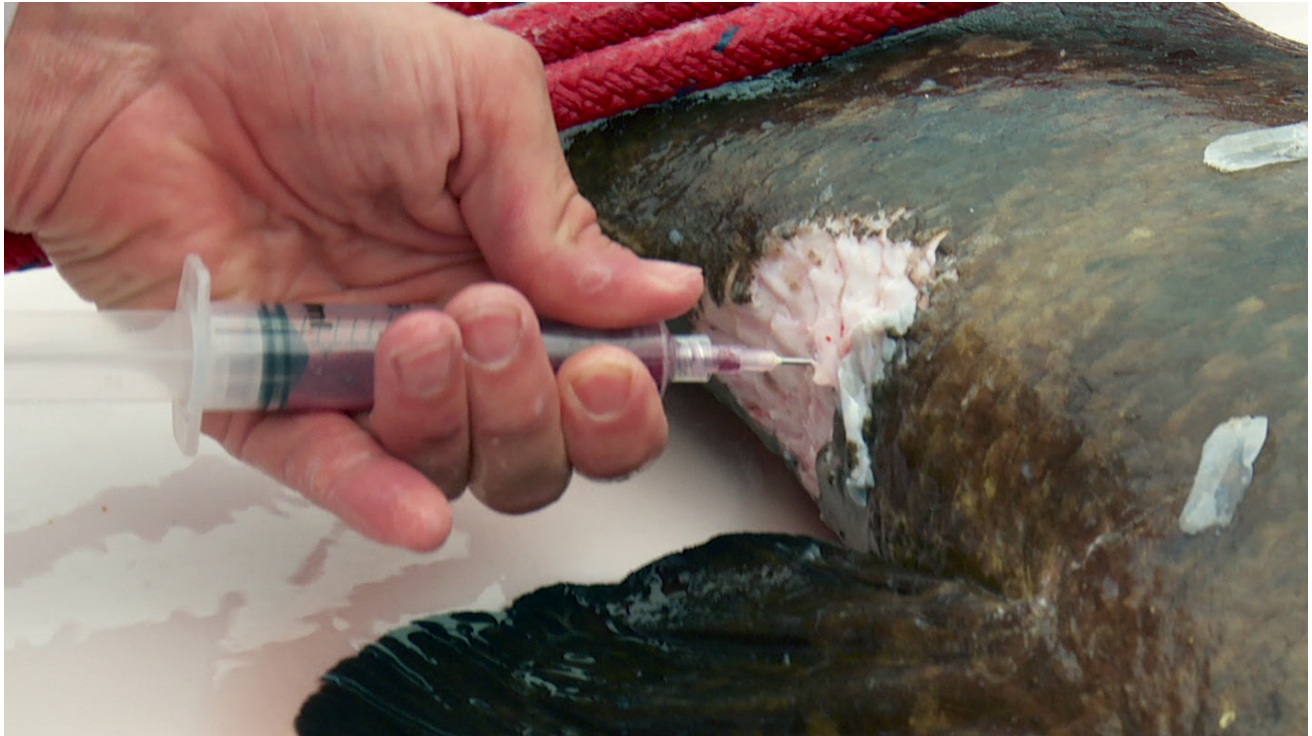

**Supplemental Figure 1.** Caudal venipuncture of Atlantic Goliath Grouper (*Epinephelus itajara*) using a sterile heparin-coated needle and syringe. Prior to puncture, scales were removed and the site was repeatedly prepared with sterile 70% isopropyl alcohol pads. Based on evidence from recaptured individuals, the area where scales were removed heals rapidly with new tissue growth.
